# Supplementary material for: Imidazole and triazole head group-containing polydiacetylenes for colorimetric monitoring of pH and detecting HCl gas
Source: Royal Society of Chemistry journal article supplement (doi:10.1039/c7qm00528h), 2017-12-06
Supplement: c7qm00528h1.pdf [file c7qm00528h1.pdf]

## Supporting Information for “Imidazole and triazole head group containing polydiacetylenes for colorimetric monitoring of pH and detecting HCl gas”

Woolin Lee,<sup>a†</sup> Dayoung Lee,<sup>a†</sup> Ji-Yeong Kim,<sup>a</sup> Songyi Lee<sup>a\*</sup>, and Juyoung Yoon<sup>a\*</sup>

<sup>a</sup>Department of Chemistry and Nano Science, Ewha Womans University, Seoul 03760, Korea; Fax: +82-2-3277-3419

E-mail: leesongyi22@naver.com; jyoon@ewha.ac.kr

|                                                                                                                            |         |
|----------------------------------------------------------------------------------------------------------------------------|---------|
| <b>Scheme S1.</b> Preparation of <b>PCDA-Im</b> and <b>PCDA-Ta</b> .....                                                   | S2 page |
| <b>Figure S1.</b> <sup>1</sup> H NMR (300 MHz) of compound <b>PCDA-Im</b> in CDCl <sub>3</sub> .....                       | S2 page |
| <b>Figure S2.</b> <sup>1</sup> H NMR (300 MHz) of compound <b>PCDA-Ta</b> in CDCl <sub>3</sub> .....                       | S3 page |
| <b>Figure S3.</b> <sup>13</sup> C NMR (62.5 MHz) of compound <b>PCDA-Im</b> in CDCl <sub>3</sub> .....                     | S3 page |
| <b>Figure S4.</b> <sup>13</sup> C NMR (125 MHz) of compound <b>PCDA-Ta</b> in CDCl <sub>3</sub> .....                      | S4 page |
| <b>Figure S5.</b> SEM and TEM images of <b>PDA-Im</b> .....                                                                | S4 page |
| <b>Figure S6.</b> Fluorescence spectra of <b>PDA-Im</b> (10 μM) in different pH (2.2-7.8).....                             | S5 page |
| <b>Figure S7.</b> Fluorescence spectra of <b>PDA-Ta</b> (1 mM) in different pH (9.0-13.0).....                             | S5 page |
| <b>Figure S8.</b> pH titration curve of <b>PDA-Im</b> (10 μM), pK <sub>a</sub> =4.06.....                                  | S6 page |
| <b>Figure S9.</b> pH titration curve of <b>PDA-Ta</b> (1 mM), pK <sub>a</sub> =12.3.....                                   | S6 page |
| <b>Figure S10.</b> UV absorption spectra of <b>PDA-Im</b> -coated glass .....                                              | S7 page |
| <b>Figure S11.</b> Raman spectra of <b>PDA-Im</b> -coated glasses and after exposure to HCl gas.....                       | S7 page |
| <b>Figure S12.</b> Images of <b>PDA-Im</b> -coated glasses after exposure to vapor of various organic solvents...<br>..... | S8 page |

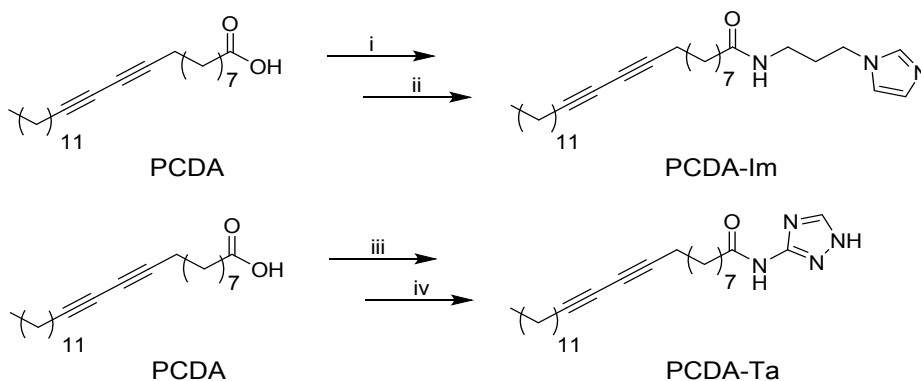

**Scheme S1.** Preparation of **PCDA-Im** and **PCDA-Ta**. (i) *N,N*-dimethylethylenediamine, *N,N'*-dicyclohexylcarbodiimide,  $\text{CH}_2\text{Cl}_2$ , 24 h. (ii) 1-(3-aminopropyl) imidazole,  $\text{CH}_2\text{Cl}_2$ , 24 h. (iii) Oxalyl chloride,  $\text{CH}_2\text{Cl}_2$ , 5 h. (iv) 3-amino-1,2,4-triazole,  $\text{CH}_2\text{Cl}_2$ , 24 h.

170816 imidazole pda

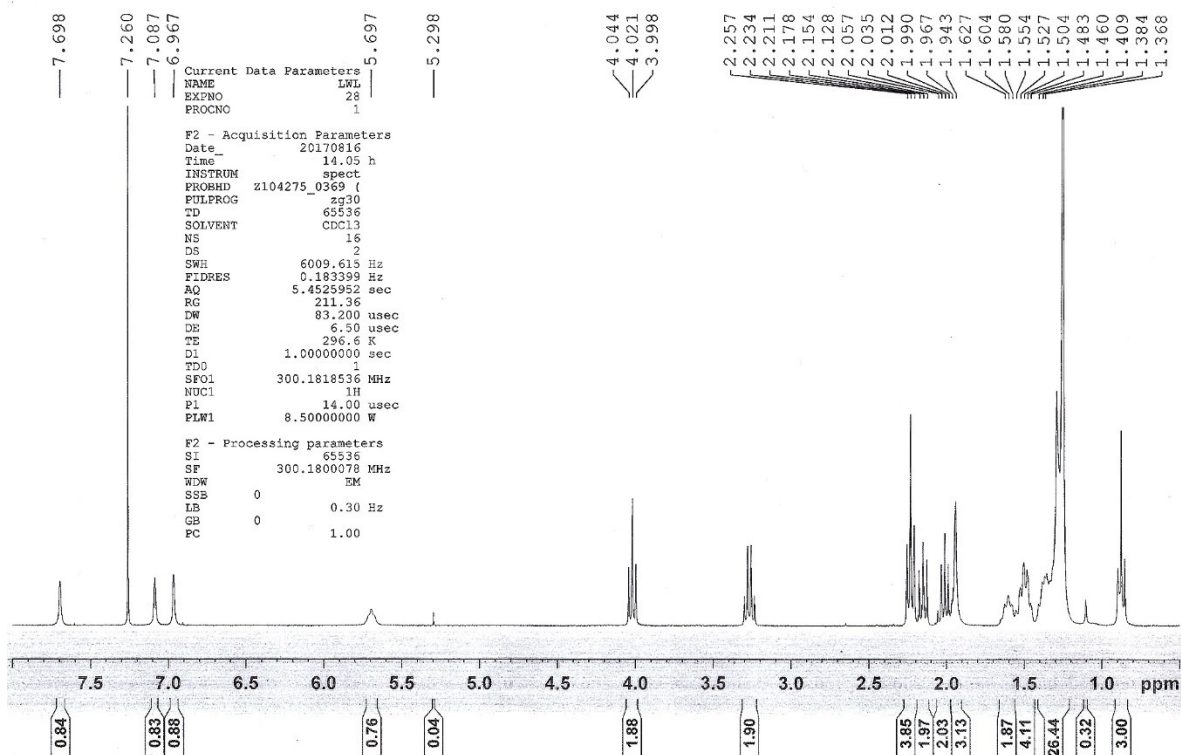

**Figure S1.**  $^1\text{H}$  NMR (300 MHz) spectrum of *N*-(3-(1H-imidazol-1-yl) propyl)pentacos-10,12-diyamide (**PCDA-Im**) in  $\text{CDCl}_3$ .

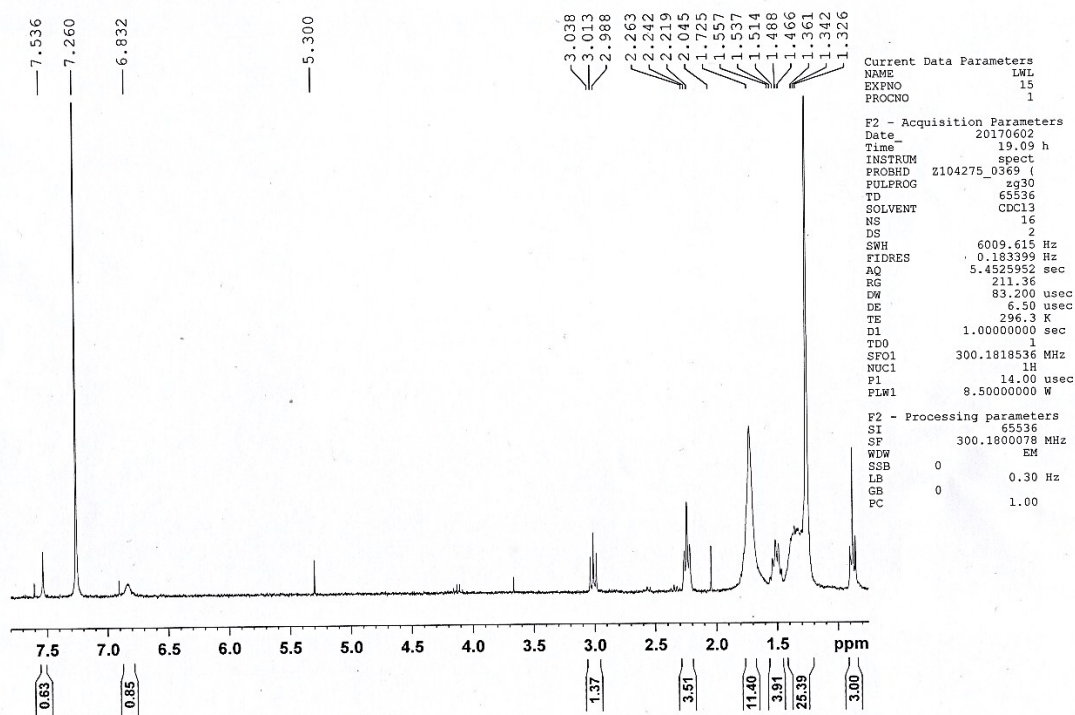

**Figure S2.**  $^1\text{H}$  NMR (300 MHz) spectrum of *N*-(2H-1,2,3-triazol-4-yl)pentacosano-10,12-diyamide (PCDA-Ta) in  $\text{CDCl}_3$ .

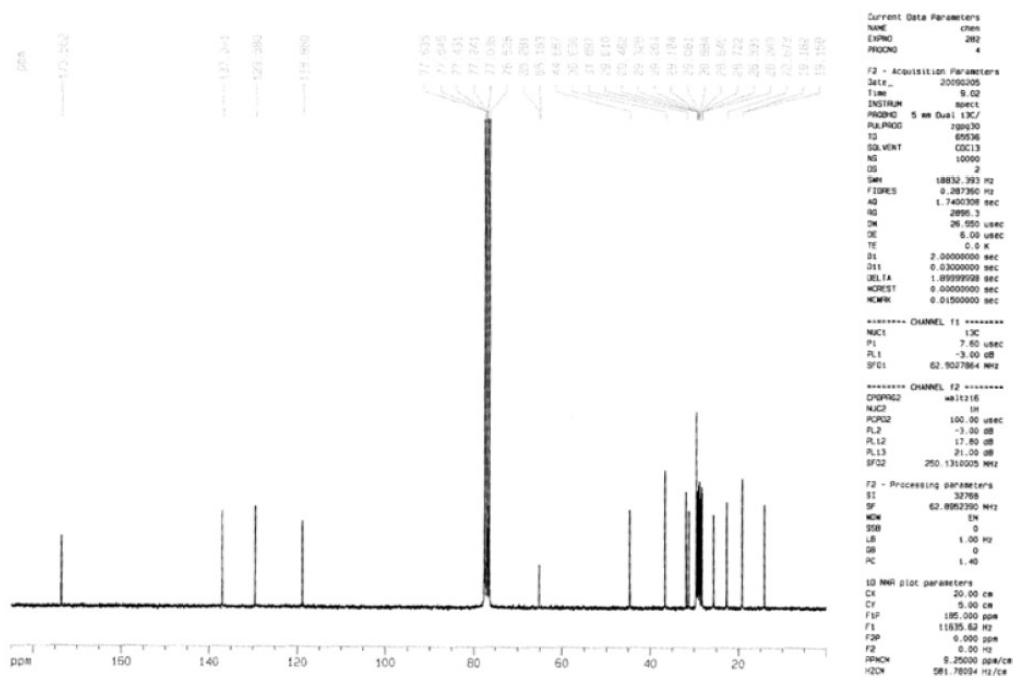

**Figure S3.**  $^{13}\text{C}$  NMR (62.5 MHz) spectrum of *N*-(3-(1H-imidazol-1-yl) propyl)pentacosano-10,12-diyamide (PCDA-Im) in  $\text{CDCl}_3$ .

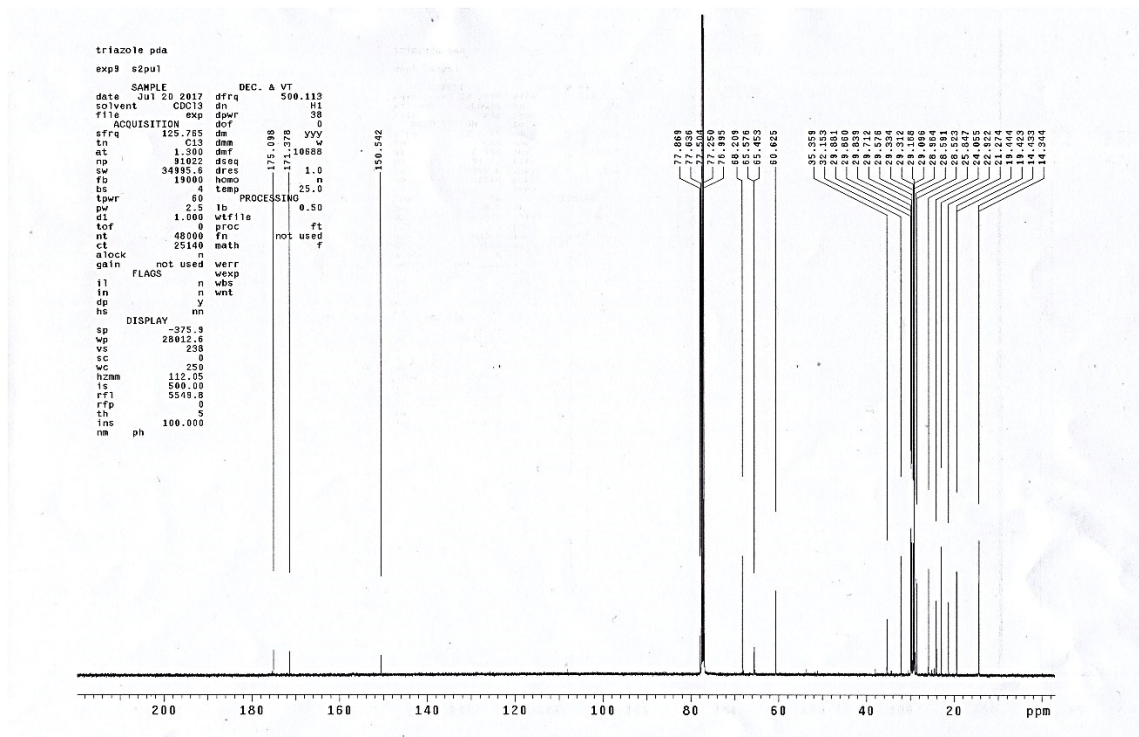

**Figure S4.**  $^{13}\text{C}$  NMR (125 MHz) spectrum of N-(2H-1,2,3-triazol-4-yl)pentacosanoic acid (PCDA-Ta) in  $\text{CDCl}_3$ .

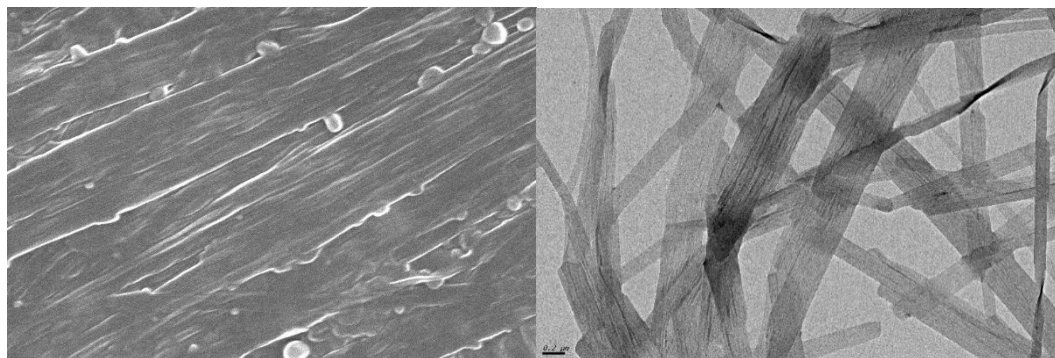

**Figure S5.** Scanning electron microscopy (SEM) and Transmission electron microscopy (TEM) images of PDA-Im.

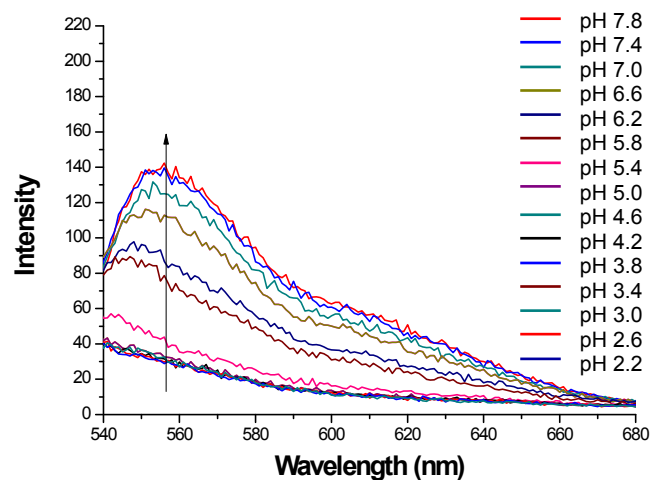

**Figure S6.** Fluorescence spectra ( $\lambda_{\text{ex}} = 530 \text{ nm}$ , slit widths: 5 nm/5 nm) of **PDA-Im** (10  $\mu\text{M}$ ) in different pH (2.2-7.8).

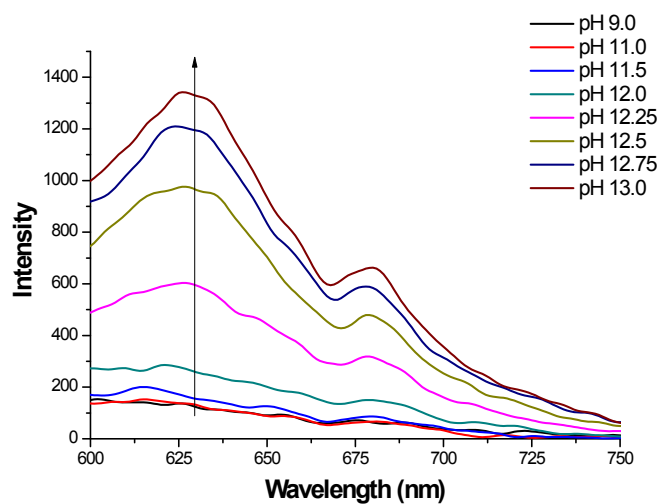

**Figure S7.** Fluorescence spectra ( $\lambda_{\text{ex}} = 540 \text{ nm}$ , slit widths: 5 nm/5 nm) of **PDA-Ta** (1 mM) in different pH (9.0-13.0).

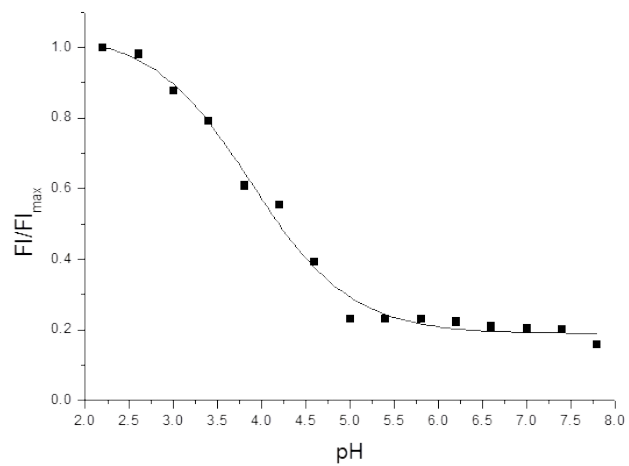

**Figure S8.** pH titration curve of **PDA-Im** (10 μM),  $pK_a=4.06$ .

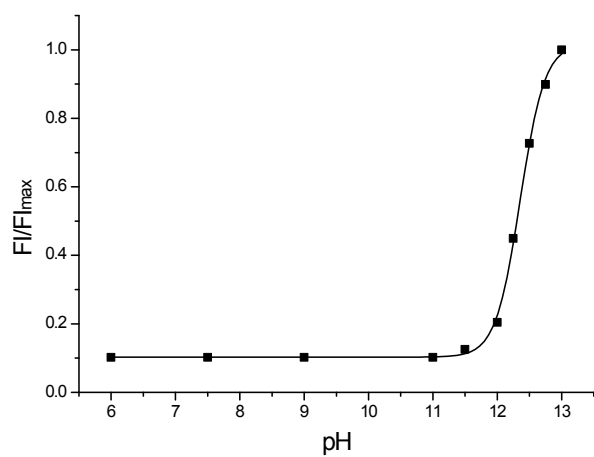

**Figure S9.** pH titration curve of **PDA-Ta** (1 mM),  $pK_a=12.3$ .

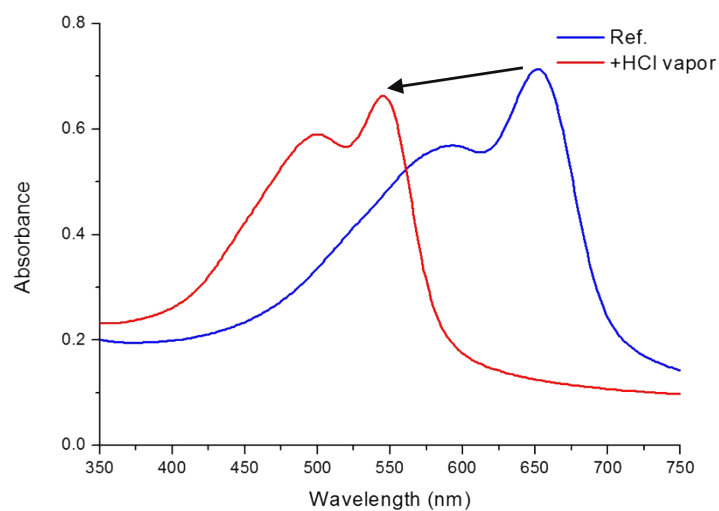

**Figure S10.** UV absorption spectra of **PDA-Im**-coated glass before and after introducing vapor of 4  $\mu\text{L}$  HCl in 100 mL chamber for 3 sec.

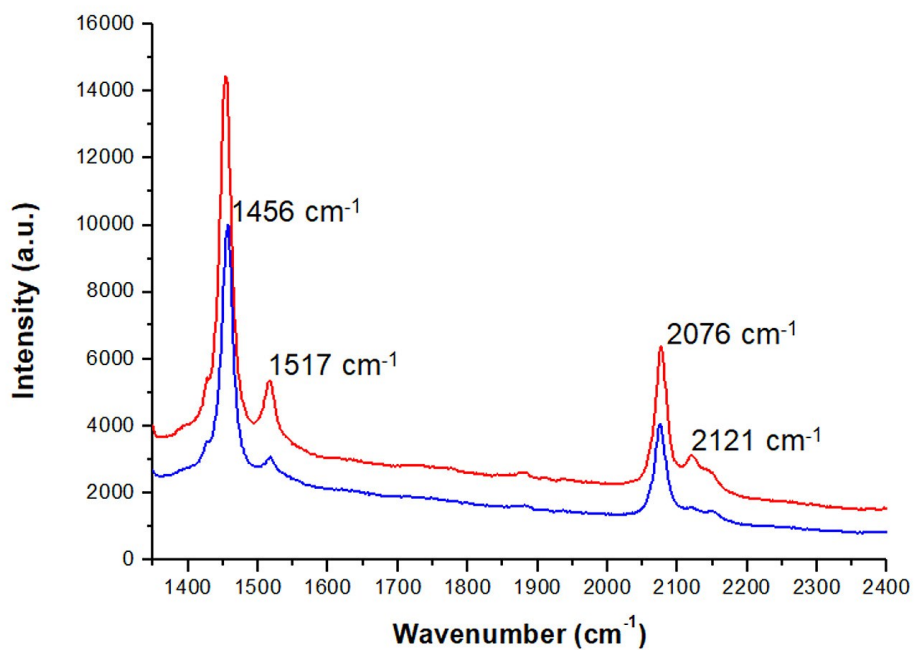

**Figure S11.** Raman spectra of **PDA-Im**-coated glasses (bottom) and after exposure to HCl gas for 3 s (top).

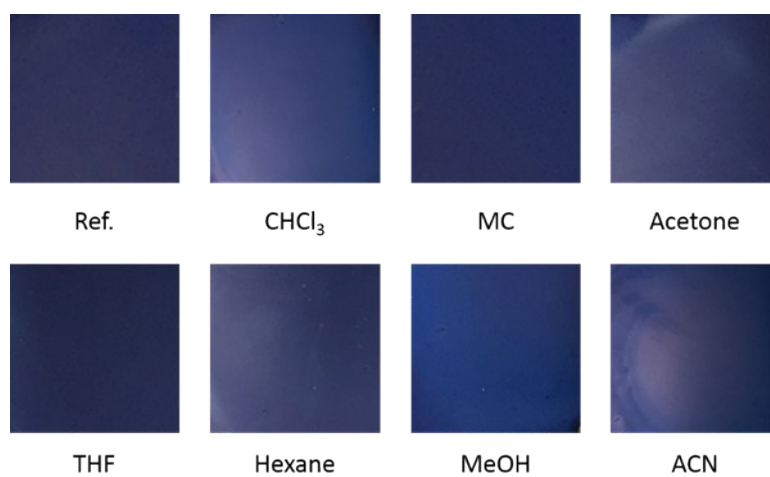

**Figure S12.** Images of PDA-Im-coated glasses after exposure to vapor of various organic solvents (10  $\mu\text{L}$  in 100 mL chamber) for 30 s.
